# Supplementary material for: Role of IL-1β Mutation in Peri-implantitis: Systematic Review and Meta-analysis
Source: Research Square preprint supplement (doi:10.21203/rs.3.rs-199454/v1), 2021-02-16
Supplement: Supplementary file 1 [file 680770cf74258b124160a102.docx]

| **Authors, year** | **Type of study** | **Newcastle-Ottawa Scale (NOS)** | | |
| --- | --- | --- | --- | --- |
| **Selection** | **Comparability** | **Exposure** |
| Shimpuku et al. 2003 | Case-control | ★★★ | ★★ | ★★ |
| Laine et al. 2006 | Case-control | ★★★ | ★★ | ★★★ |
| Lachmann et al. 2007 | Case-control | ★★★ | ★★ | ★★★ |
| Lin et al. 2007 | Case-control | ★★★ | ★★ | ★★ |
| Hamdy et al. 2007 | Case-control | ★★★ | ★★ | ★★★ |
| Melo et al. 2012 | Case-control | ★★★ | ★★ | ★★★ |
| García-Delaney et al. 2015 | Case-control | ★★★ | ★★ | ★★★ |
